# Supplementary material for: Synthesis and optoelectronic characterization of conjugated phosphorescent polyelectrolytes with a neutral Ir complex incorporated into the polymer backbone and their neutral precursors
Source: Royal Society of Chemistry journal article supplement (doi:10.1039/b615674f), 2006-12-15
Supplement: b615674f.pdf [file b615674f.pdf]

Supplementary Material (ESI) for Journal of Materials Chemistry

This journal is (c) The Royal Society of Chemistry 2006

Supporting Information for

**Synthesis and Optoelectronic Characterization of  
Conjugated Phosphorescent Polyelectrolytes with Neutral Ir  
Complex Incorporated into Polymer backbone and Their  
Neutral Precursors**

*Yong Zhang, Yunhua Xu, Qiaoli Niu, Wei Yang, Junbiao Peng, Xuhui Zhu, Yong Cao\**

Institute of Polymer Optoelectronic Materials and Devices, Key Laboratory of Special  
Functional Materials of Ministry of Education, South China University of Technology,

Guangzhou 510640, P. R. China

\*Corresponding Author: Yong Cao, Junbiao peng Fax: +86-20-87110606; Tel:

+86-20-87114609; Email: [poycao@scut.edu.cn](mailto:poycao@scut.edu.cn), [psjbpeng@scut.edu.cn](mailto:psjbpeng@scut.edu.cn)

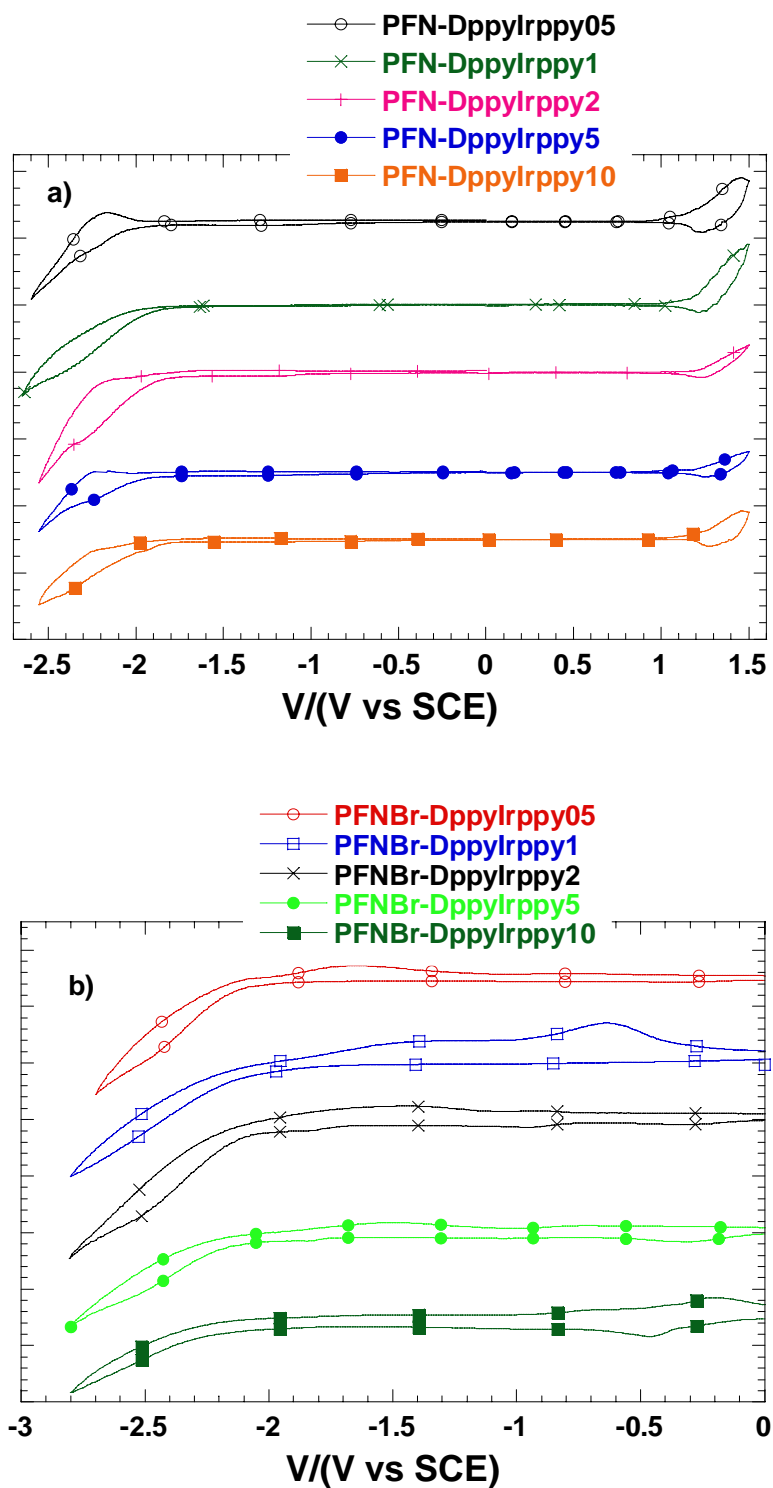

**Figure S1** Cyclic voltammograms of the neutral polymers films coated on platinum electrodes in 0.1 mol/L Bu<sub>4</sub>NPF<sub>6</sub>, CH<sub>3</sub>CN solution (a) and the quaternized polymers (around 10<sup>-3</sup> mol/L) in 0.1 mol/L Bu<sub>4</sub>NPF<sub>6</sub>, DMF solution (b).
